# Supplementary material for: Seasonal variations in cause-specific mortality and transition to renal replacement therapy among patients with end-stage renal disease
Source: PubMed Central journal article supplement (PMC7012814; doi:10.1038/s41598-020-59153-6), 2020-02-11
Supplement: 41598_2020_59153_MOESM1_ESM.pdf [file 41598_2020_59153_MOESM1_ESM.pdf]

## **Supplementary Material**

# **Seasonal variations in cause-specific mortality and transition to renal replacement therapy among patients with end-stage renal disease**

Shunsuke Goto<sup>1,2</sup>, Takayuki Hamano<sup>1,3</sup>, Satoshi Ogata<sup>1,4</sup>, and Ikuto Masakane<sup>1,5</sup>

1. Committee of Renal Data Registry, Japanese Society for Dialysis Therapy, Tokyo, Japan

2. Division of Nephrology and Kidney Center, Kobe University Graduate School of Medicine, Kobe, Japan

3. Department of Inter-Organ Communication Research in Kidney Disease, Osaka University Graduate School of Medicine, Suita, Japan

4. Department of Clinical Nutrition, Hiroshima International University, Kure, Japan

5. Department of Nephrology, Honcho Yabuki Clinic, Yamagata, Japan

**Supplementary Table S1.** Mortality ratio between the summer and the other seasons in subgroups of hemodialysis patients

|                           | spring | summer | autumn | winter |
|---------------------------|--------|--------|--------|--------|
| All patients              | 1.165  | 1.000  | 1.112  | 1.350  |
| Age (years)               |        |        |        |        |
| <60                       | 1.124  | 1.000  | 1.128  | 1.336  |
| 60= $<$ <70               | 1.092  | 1.000  | 1.196  | 1.347  |
| 70= $<$ <80               | 1.140  | 1.000  | 1.096  | 1.330  |
| 80= $<$                   | 1.224  | 1.000  | 1.092  | 1.354  |
| Sex                       |        |        |        |        |
| Men                       | 1.182  | 1.000  | 1.136  | 1.389  |
| Women                     | 1.134  | 1.000  | 1.070  | 1.282  |
| Diabetes                  |        |        |        |        |
| Diabetes                  | 1.209  | 1.000  | 1.126  | 1.363  |
| Non-diabetes              | 1.119  | 1.000  | 1.099  | 1.336  |
| Past history of CVD       |        |        |        |        |
| Past history of CVD       | 1.174  | 1.000  | 1.094  | 1.348  |
| No past history of CVD    | 1.151  | 1.000  | 1.133  | 1.346  |
| Difference of temperature |        |        |        |        |
| Smallest                  | 1.214  | 1.000  | 1.103  | 1.367  |
| Second smallest           | 1.079  | 1.000  | 1.046  | 1.280  |
| Second largest            | 1.220  | 1.000  | 1.092  | 1.408  |
| Largest                   | 1.140  | 1.000  | 1.203  | 1.339  |

CVD, cardiovascular disease.

**Supplementary Table S2.** Adjusted incidence rate ratio for death associated with seasons

|                     | Model 1<br>(Unadjusted) | Model 2          | Model 3          | Model 4          |
|---------------------|-------------------------|------------------|------------------|------------------|
| Spring              | 1.15 [1.10–1.20]        | 1.16 [1.11–1.20] | 1.15 [1.10–1.20] | 1.15 [1.10–1.20] |
| Summer [Ref.]       | 1.00                    | 1.00             | 1.00             | 1.00             |
| Autumn              | 1.13 [1.08–1.17]        | 1.12 [1.07–1.16] | 1.12 [1.08–1.17] | 1.12 [1.08–1.17] |
| Winter              | 1.34 [1.28–1.39]        | 1.34 [1.29–1.40] | 1.33 [1.28–1.39] | 1.33 [1.28–1.39] |
| Men                 |                         | 1.22 [1.18–1.26] | 1.14 [1.11–1.18] | 1.14 [1.10–1.18] |
| Age (year)          |                         | 1.07 [1.07–1.07] | 1.07 [1.07–1.07] | 1.07 [1.07–1.07] |
| Diabetes            |                         |                  | 1.21 [1.17–1.25] | 1.21 [1.18–1.25] |
| Past history of CVD |                         |                  | 1.93 [1.86–2.00] | 1.93 [1.86–2.00] |

CVD, cardiovascular disease.

Model 2: adjusted for sex and age. Model 3: adjusted for covariates in Model 2, diabetes, and past history of CVD. Model 4: adjusted for covariates in Model 3 and places of residence.

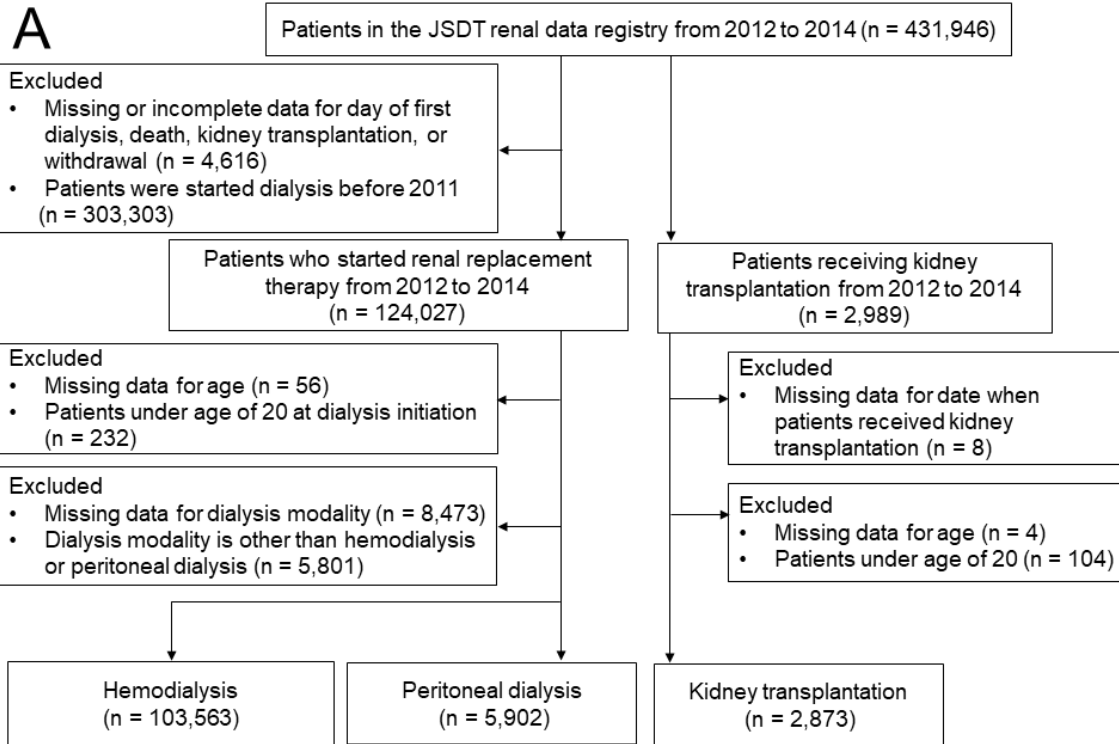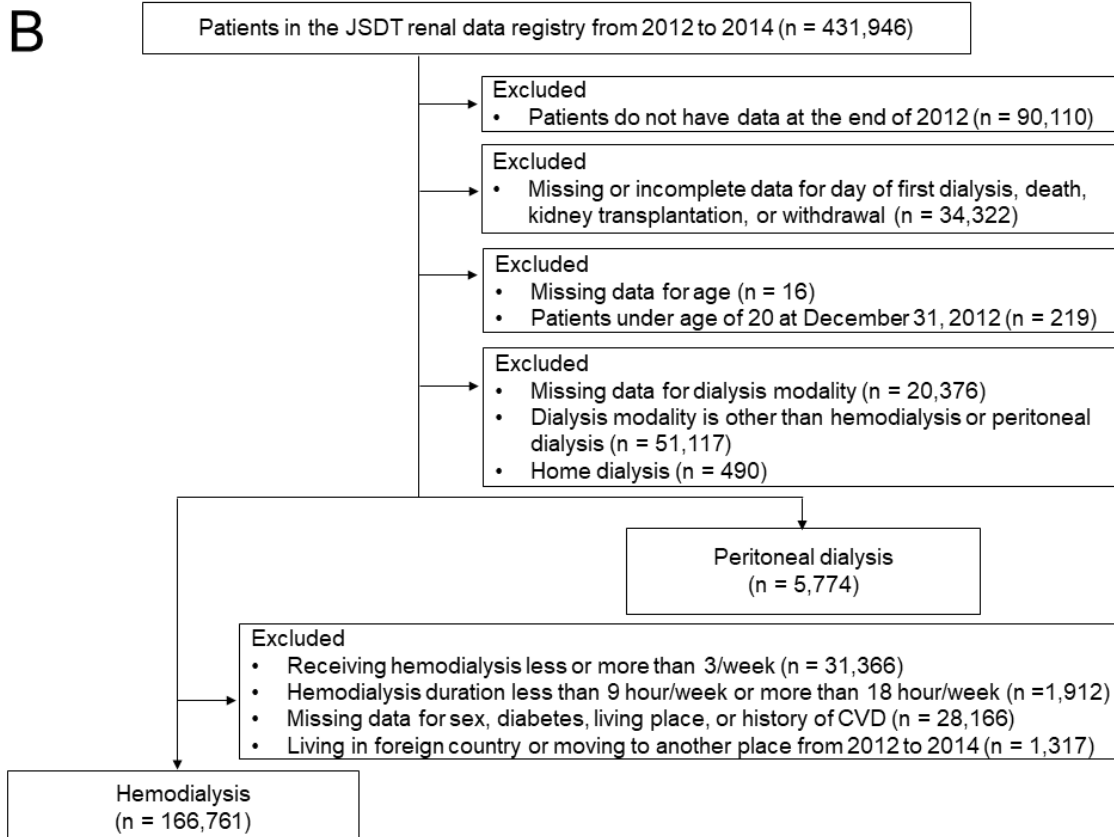

**Supplementary Figure S1.** Flow diagram in (A) the analysis of seasonal variation in the transition to renal replacement therapy and (B) the analysis of seasonal variation in mortality.
